# Dopamine in the songbird auditory cortex shapes auditory preference

Helena J. Barr<sup>1,2</sup>, Erin M. Wall<sup>1,2</sup>, and Sarah C. Woolley<sup>1,2,3\*</sup>

<sup>1</sup> Integrated Program in Neuroscience, McGill University, Montreal, QC, Canada

<sup>2</sup> Center for Research on Brain, Language, and Music, McGill University, Montreal QC, Canada

<sup>3</sup> Department of Biology, McGill University, Montreal, QC, Canada

\*Correspondence to [sarah.woolley@mcgill.ca](mailto:sarah.woolley@mcgill.ca)

keywords: auditory pallium, caudomedial nidopallium, female preference, zebra finch

Running Title: dopamine shapes song preference

## ABSTRACT

1

2 In vocal communication, vocal signals can provide listeners with information and

3 also elicit motivated responses. Auditory cortical and mesolimbic reward circuits

4 are often considered to have distinct roles in these processes, with auditory

5 cortical circuits responsible for detecting and discriminating sounds and

6 mesolimbic circuits ascribing salience and modulating preference for those

7 sounds. Here, we investigated whether dopamine within auditory cortical circuits

8 themselves can shape the incentive salience of a vocal signal. Using female

9 zebra finches, who show natural preferences for vocal signals produced by males

10 ('songs'), we found that pairing passive song playback with pharmacological

11 manipulations of dopamine in the secondary auditory cortex drives changes to

12 song preferences. Plasticity of song preferences by dopamine lasted for at least

13 one week and was not influenced by norepinephrine manipulations. These data

14 suggest that dopamine acting directly in sensory processing areas can shape the

15 incentive salience of communication signals.

## 16 INTRODUCTION

17

18 Vocal signals are critical for survival and reproduction in a range of species.

19 Receivers can extract substantial information from vocal signals about the

20 identity, species, or motivation of the signaller and make mate-choice and other

21 social decisions based on the incentive salience of the signal. However, there is

22 growing consensus that receivers, and their auditory systems, are not passive

23 filters, but rather they dynamically encode acoustic stimuli.<sup>1,2</sup> Consequently, a

24 signal's salience may not be an inherent component of the signal, but instead be

25 determined by the individual receiver's internal state and experience<sup>3,4</sup>. For

26 example, in fish, frogs, and birds, reproductive status, acting through changes in

27 steroid hormones and neuromodulators, can influence auditory responses and

28 the processing of mating calls<sup>5-7</sup>. Similarly, maternal experience and reproductive

29 status dramatically shape the way that female rodents respond to pup calls, in

30 part due to neuromodulatory shaping of auditory responses<sup>8-10</sup>. Thus, the

31 response to vocal communication signals depends not only on the signal itself,

32 but also on the ascribed salience of those signals to an individual receiver.

33

34 Dopamine (DA) is a key modulator for ascribing incentive salience to stimuli,

35 providing the brain with information on which sensory stimuli are relevant or

36 important<sup>11-13</sup>. Dopamine neurons in the ventral tegmental area (VTA) respond to

37 reward-related stimuli in learning tasks across sensory domains<sup>14,15</sup>. Moreover,

38 dopaminergic projections from the VTA to regions like the nucleus accumbens

39 have been found to influence a wide range of motivated behaviors<sup>13,14,16</sup>. For  
40 example, DA acting within the nucleus accumbens can shape behavioral  
41 responses and preferences for particular stimuli, including social stimuli. In male  
42 prairie voles, injections of DA agonists into the nucleus accumbens induces  
43 partner preference<sup>17,18</sup>. Thus, dopaminergic activity can serve to modulate  
44 behavioral responses to communication signals.

45

46 However, little is known about how DA can act on areas outside the traditional  
47 mesolimbic pathway to influence incentive salience for sensory stimuli. Recent  
48 studies have documented that DA signals from the VTA can shape activity and  
49 tuning in the auditory cortex<sup>19,20</sup> while DA signals in the nucleus accumbens  
50 relate to reward value or incentive salience<sup>12</sup>. This has led to the model that DA  
51 from the VTA simultaneously acts at the level of the nucleus accumbens to shape  
52 preferences and at the level of sensory cortex to correspondingly shape sensory  
53 tuning to those stimuli<sup>11,21</sup>. However, it is not known whether DA acting in the  
54 sensory cortex itself could drive changes in the salience and incentive value of  
55 sensory stimuli.

56

57 Here, we investigated the degree to which preferences for particular vocal  
58 communication signals can be altered by manipulating neuromodulatory input to  
59 the auditory cortex. We studied this in the zebra finch, a species of songbird in  
60 which adult females identify individuals and select mates based on their complex,  
61 learned vocalizations ('songs'). We found that pharmacological manipulation of

62 dopaminergic activity in the auditory cortex significantly shaped preferences for  
63 song and could reverse preferences for some songs over others. These data  
64 suggest that DA can act directly in sensory processing areas to shape the  
65 incentive salience of and preferences for stimuli.

66

## 67 RESULTS

68

69 *Dopamine neurons in the caudal VTA show greater responses to preferred songs*

70

71 We first quantified female preferences for songs using a two-choice operant  
72 assay (Fig. 1A)<sup>22,23</sup>. In this assay, female zebra finches were provided two  
73 strings, each of which activated the playback of a song from a single male zebra  
74 finch when pulled (e.g., Male A for one string, Male B for the other string). For  
75 each of the five song pairs tested, females showed significant song preferences  
76 for one of the songs of the pair ( $p < 0.01$  for all; Fig. 1B; see Methods). For four of  
77 the five pairs, there was variation across females in which song was preferred  
78 (e.g. some females preferred Male A, others Male B; Fig. 1C). However, for one  
79 of the pairs of songs (Male J and Male K), females consistently preferred the  
80 song of one male of the pair over the song of the other male (Fig. 1B;  $t_{(16)} = 4.29$ ,  
81  $p = 0.0006$ ).

82

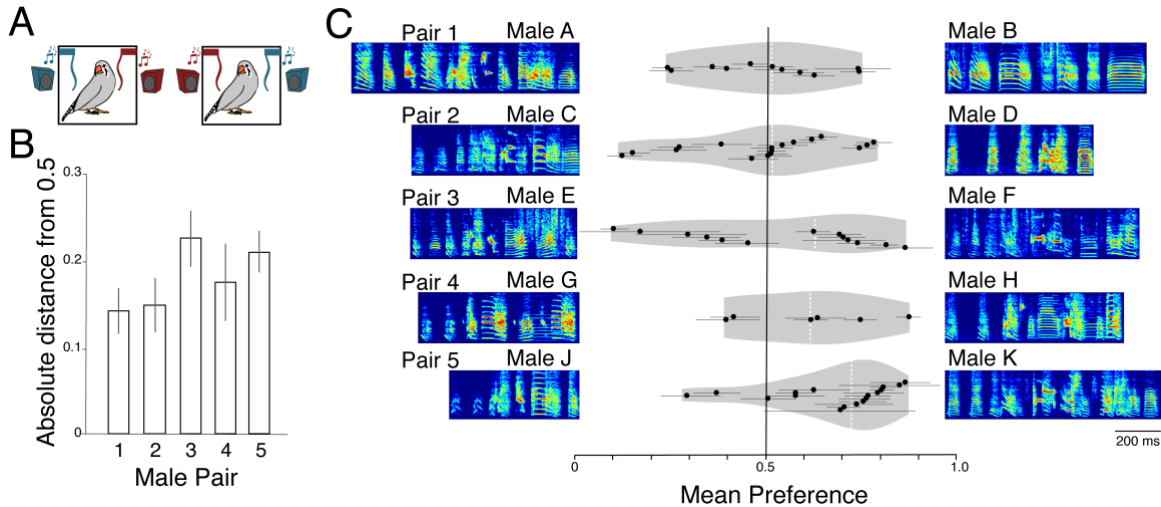

83

84 Figure 1. Females song preferences revealed by string pull assay. A) Females were tested in a string pull  
85 assay where each string triggered playback of a song of a particular male. Contingencies were reversed  
86 halfway through testing to control for side bias. B) The absolute distance in preference score from 0.5 (which  
87 corresponds to a lack of bias for one specific song) was significantly greater than zero for all five pairs,  
88 indicating that females showed preferences for the song of one male over another. C) While each individual  
89 female showed significant preferences for one song within all pairs of male songs, there was significant  
90 individual variation in which male was preferred for all but one of the pairs. Violin plots (gray shading  
91 indicating the probability density) show the responses of females to pairs of songs, indicated by  
92 spectrograms of the song motifs at each end of the plots. Points are the responses of individual females with  
93 horizontal lines from the point indicating bootstrapped confidence intervals. Vertical white dashed lines  
94 indicate the median of preferences across all females. Motifs are labeled with an ID for each male and  
95 ordered by male pair as in B. Only for the bottom pair of males (Pair 5: Male J and Male K) did female  
96 preference differ significantly from 0.5, indicating consistent preferences for Male K across females.  
97

98 We leveraged the fact that a majority of females clearly preferred one of the two  
99 males in Pair 5 (Fig. 1C) to investigate whether catecholaminergic neurons in the  
100 midbrain and hindbrain differentially respond to songs with different degrees of  
101 incentive salience, i.e. preferred versus less preferred songs. We calculated the  
102 percent of tyrosine hydroxylase (TH) neurons that expressed the immediate early  
103 gene FOS in birds that heard either the preferred or less-preferred song, or were  
104 left in silence. We found significant variation in responses across the five brain  
105 regions we measured ( $F_{(8,109)}=14.212$ ,  $p<0.0001$ ; Fig. 2). The caudal ventral  
106 tegmental area (cVTA) was the only region to differentially respond to preferred  
107 vs. less-preferred song. In particular, a greater percentage of DA neurons in the

108 cVTA expressed FOS following playback of preferred song than following  
109 playback of the less-preferred song ( $p=0.0013$ ) or silence ( $p=0.0002$ ). In contrast,  
110 while more TH neurons in the locus coeruleus (LC) and periaqueductal gray  
111 (PAG) expressed FOS in response to hearing songs ( $p<0.0001$  for each), these  
112 neurons responded similarly to preferred and less-preferred songs (PAG:  
113  $p=0.4943$ ; LC:  $p=0.0630$ ). These data support previous work that finds that  
114 catecholamine-synthesizing neurons in the midbrain and hindbrain respond to  
115 playbacks of social signals<sup>24</sup>. In addition, these data highlight that dopaminergic  
116 neurons in the VTA, but not in other catecholamine-producing cells in the  
117 midbrain and hindbrain, are differentially activated by songs with different  
118 degrees of incentive salience. Together, this suggests that songs with different  
119 incentive values lead to differing amounts of dopamine release in areas  
120 downstream to the VTA.

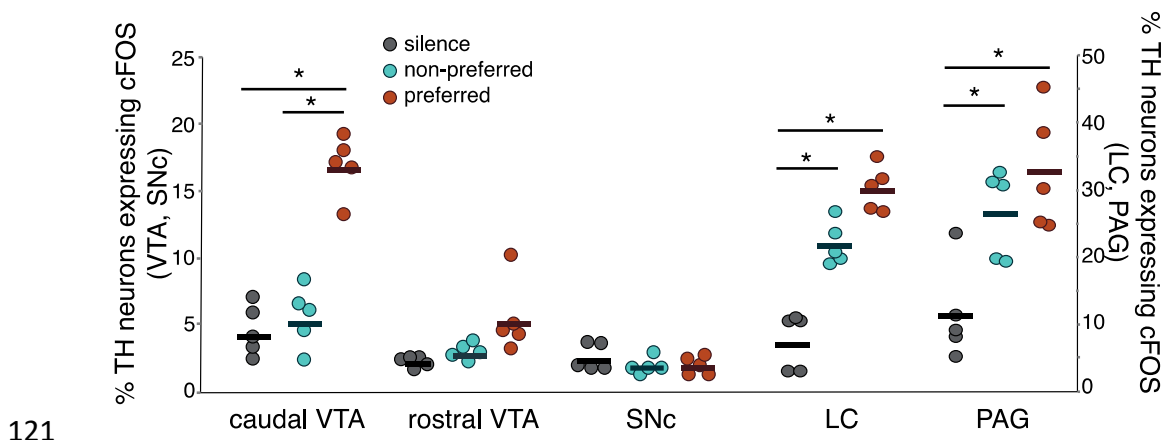

122 Figure 2. Hearing preferred songs drives FOS expression in dopaminergic neurons of the caudal  
123 VTA. The percent of tyrosine hydroxylase (TH) neurons expressing FOS in the ventral tegmental  
124 area (VTA) and substantia nigra pars compacta (SNc; left axis) and the locus coeruleus (LC) and  
125 periaqueductal gray (PAG; right axis) following playback of preferred songs (orange) or non-  
126 preferred songs (teal) and in silent controls. In the caudal VTA, preferred song elicited  
127 significantly more FOS expression in TH neurons than either non-preferred song or silence. In  
128 the LC and PAG, both preferred and non-preferred songs elicited more FOS in TH neurons,  
129 however, there was no significant difference in the percent of TH neurons expressing FOS  
130 between preferred and non-preferred songs.

131

132 *Pairing song playback with a general dopamine agonist shifts song preference*

133

134 To investigate whether catecholamine release into the auditory cortex could  
135 shape song preferences, we paired infusions of catecholaminergic drugs into the  
136 secondary auditory pallium (Fig. 3A and 3B) with passive playback of a male's  
137 song. We targeted the caudomedial nidopallium (NCM), a secondary auditory  
138 region important for auditory processing and implicated in auditory memory<sup>25–28</sup>.  
139 In particular, after measuring the song preferences of individual females (Day 1),  
140 we paired infusions of catecholamine agonists with playback of the less-preferred  
141 song and paired infusions of vehicle (5% DMSO in phosphate buffered saline  
142 (PBS); see Methods) with playback of the preferred song (Days 2 and 3).  
143 Females were then re-tested for song preferences (Day 4; i.e., preference for one  
144 song compared to the other song of the pair; same as Day 1; see Methods; Fig.  
145 3B).

146

147 We first tested the effects of broad, general catecholaminergic agonists to  
148 determine whether DA or norepinephrine (NE) could alter female song  
149 preferences (change in preference scores from Day 1 to Day 4). We found that  
150 pairing the less-preferred song with the general DA agonist apomorphine (APO)  
151 significantly affected female preferences for song ( $t_{(5)}=-5.09$ ,  $p=0.0038$ ).  
152 Specifically, pairing playbacks of the less-preferred song with APO infusions into  
153 the NCM led to a significant increase in preference for that song between Day 1



154 and Day 4 (Fig. 3C). In contrast, song preferences were stable and unchanged  
155 between Day 1 and Day 4 in the control condition, when playback of the less-  
156 preferred song (as well as to the preferred song) was paired with vehicle (VEH;  
157  $t_{(6)}=1.06$ ,  $p=0.3306$ , Fig 3D). Similarly, pairing the less-preferred song with NE in  
158 the NCM also did not significantly alter preferences ( $t_{(5)}=-1.52$ ,  $p=0.1895$ ; Fig.  
159 3E).  
160

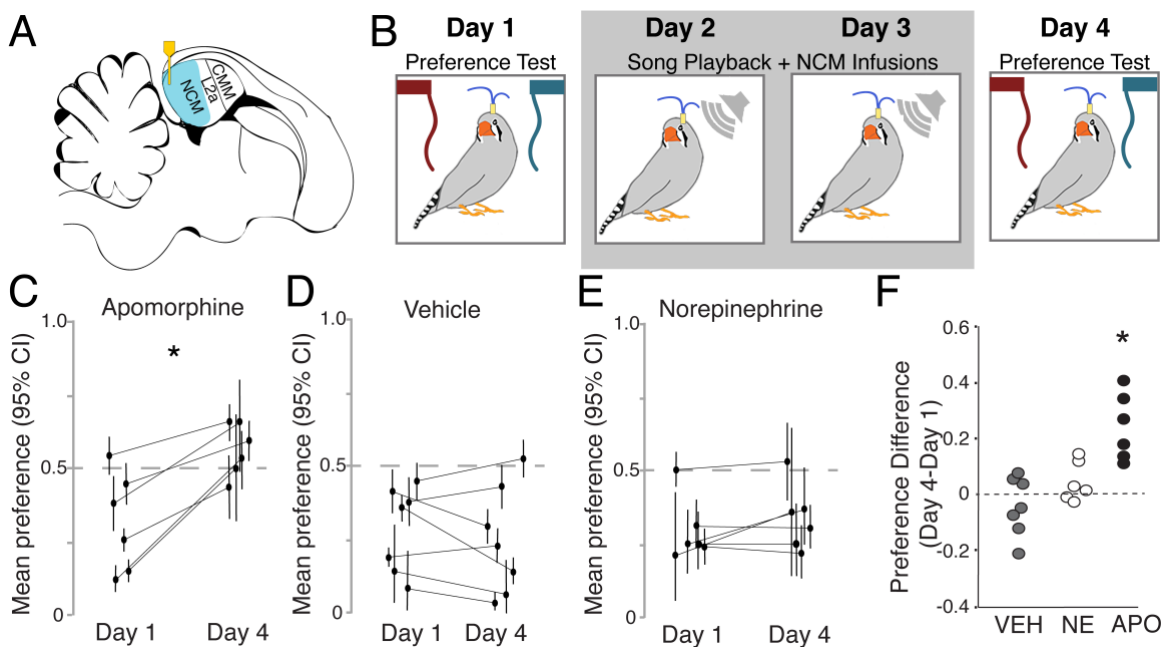

161

162 Figure 3. Dopamine in NCM modulates song preference. A) Microdialysis cannulae were implanted into the  
163 caudomedial nidopallium (NCM; blue). Parasagittal illustration of the location of the cannulae (yellow)  
164 relative to the NCM, the input "layer" of the primary auditory pallium Field L (L2a), and the secondary  
165 auditory pallial region the caudomedial mesopallium (CMM). Dorsal is up, caudal is left. B) Diagram of the  
166 experimental protocol. Females were tested for preference using a string pull assay on Day 1. On Days 2  
167 and 3 females were infused with either vehicle (VEH) or drug 10 minutes prior to 2-hours of song playback.  
168 Drug and song combinations during Days 2 and 3 depended on the experiment (see Methods). In general,  
169 for agonist tests, agonists were paired with playback of the less-preferred song and VEH was paired with the  
170 preferred song. For control tests, VEH infusions were paired with playback of the less-preferred as well as  
171 the preferred songs. On Day 4, females were tested again in the string pull assay. The order of drug and  
172 control infusions (Day 2 and Day 3) were randomized across birds and tests. C) Females given the general  
173 agonist apomorphine paired with playback of the less-preferred song significantly shifted their preferences  
174 toward the originally less-preferred song. Points are the preference for the less-preferred song for individual  
175 birds, bars indicate bootstrapped confidence intervals (see Methods). No significant changes in preference  
176 from Day 1 to Day 4 were observed in vehicle treated control females(D) or in females given norepinephrine  
177 (E). F) The change in preference between Day 1 and Day 4 was significantly higher in females that received  
178 apomorphine (APO) than females infused with VEH or norepinephrine (NE). \* indicates  $p<0.05$ .  
179

180 To compare directly between drugs, we calculated the change in preference from  
181 Day 1 to Day 4 and compared the degree of change between the three  
182 treatments (Fig. 3F; see Methods). Overall, there was significant variation across  
183 treatments ( $F_{(2, 12.4)}=10.43$ ,  $p=0.0022$ ), with a greater change in preference for  
184 APO than for either NE ( $p=0.0334$ ) or VEH ( $p=0.0017$ ). Thus, when coupled with  
185 passive song playback, DA, but not NE, in a secondary auditory cortical region  
186 modulates song preference. These data indicate that DA in the secondary  
187 auditory cortex influences the incentive salience of songs. Given this finding, it is  
188 important to reveal the involvement of specific DA receptor subtypes, persistence  
189 of the effect, and nature of drug pairing on female auditory preferences.

190

#### 191 *D1 receptors participate in shifting song preference*

192

193 D1-type receptors are highly expressed in the auditory forebrain, including  
194 NCM<sup>29</sup>. To investigate the degree to which D1-type receptors are involved in  
195 song preferences, we paired song playback with D1 receptor-specific agonists,  
196 antagonists, or VEH (see Methods). Like APO, pairing infusions of the D1  
197 receptor-specific agonist SKF81297 into the NCM with playback of the less-  
198 preferred song led to a significant increase in the preference for the less-  
199 preferred song ( $t_{(5)}=-5.10$ ;  $p=0.0038$ ; Fig. 4A) such that females no longer  
200 demonstrated a significant preference for the previously preferred song.  
201 Conversely, pairing playback of the preferred song with infusions of the D1-  
202 receptor antagonist (SCH23390) tended to decrease the preference for the

203 preferred song ( $t_{(6)}=-1.84$ ;  $p=0.1147$ ; Fig. 4B). Both D1-receptor drugs produced  
204 greater shifts in preference relative to the vehicle control condition ( $F_{(2,6.62)}=45.31$ ;  
205  $p=0.0001$ ; Fig. 4C). In particular, the shift in preference was significantly greater  
206 for the D1-receptor agonist than for VEH ( $p=0.0001$ ), and tended to be greater for  
207 the D1-antagonist than for VEH ( $p=0.0541$ ). Together these data indicate that  
208 manipulation of D1 receptors in the auditory cortex during song playback can  
209 produce substantial changes in preference and highlight the importance of D1  
210 receptors in the auditory forebrain in ascribing incentive salience to stimuli.

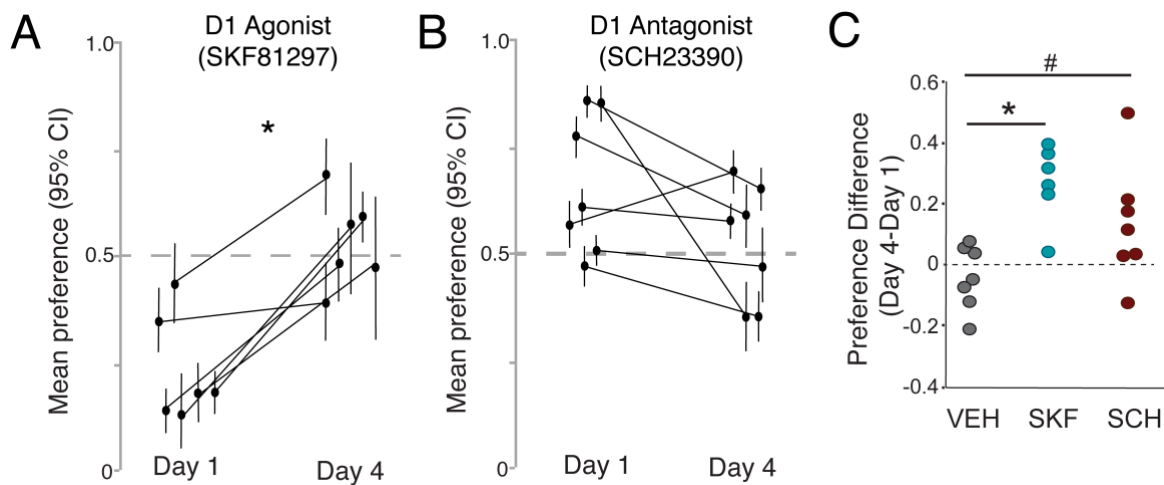

211

212 Figure 4. Dopamine D1 receptors in the NCM affect song preference A) Females given the D1 receptor  
213 agonist SKF81297 paired with playback of the less-preferred song significantly increased their preferences  
214 toward the originally less-preferred song. Points are individual birds, bars indicate bootstrapped confidence  
215 intervals (see Methods). No preference is at 0.5 indicated by the dashed line. B) Females given the D1  
216 receptor antagonist SCH23390 paired with playback of the preferred song show a trend toward diminished  
217 preference for the preferred song. C) The change in preference between Day 1 and Day 4 was greater in  
218 females that received the D1 receptor agonist or antagonist than females infused with VEH.\* indicates  
219  $p<0.05$ ; # indicates  $p=0.054$ .

220

221 *Song preference shifts are not a consequence of changes in motor behavior*

222

223 Given the known roles of dopamine in modulating motor behavior and motivation,

224 we investigated whether the drug manipulations had general effects on string

225 pulling behavior overall and the degree to which these changes could have  
226 contributed to the shifts in preference. While across all treatments, the total  
227 amount of string pulling for either string on Day 4 was lower than that on Day 1  
228 ( $F_{(1, 43.2)}=8.78$ ,  $p=0.0049$ ), the shifts in preference were not due to the overall  
229 changes in string pulling. Although different drugs had different effects on female  
230 preferences, the degree to which females changed the amount of string pulling  
231 did not vary across drugs (Drug X Day interaction:  $F_{(4,43.2)}=0.49$ ,  $p=0.7455$ ; Suppl  
232 Fig. 1A). Further, the percent change in string pulling did not significantly  
233 correlate with changes in preference for any of the conditions (Suppl Fig. 1B;  
234  $p>0.05$  for all conditions). Taken together, these data indicate that the changes in  
235 preference were not due to general effects of drug manipulations on motor  
236 behavior or the motivation to hear song.

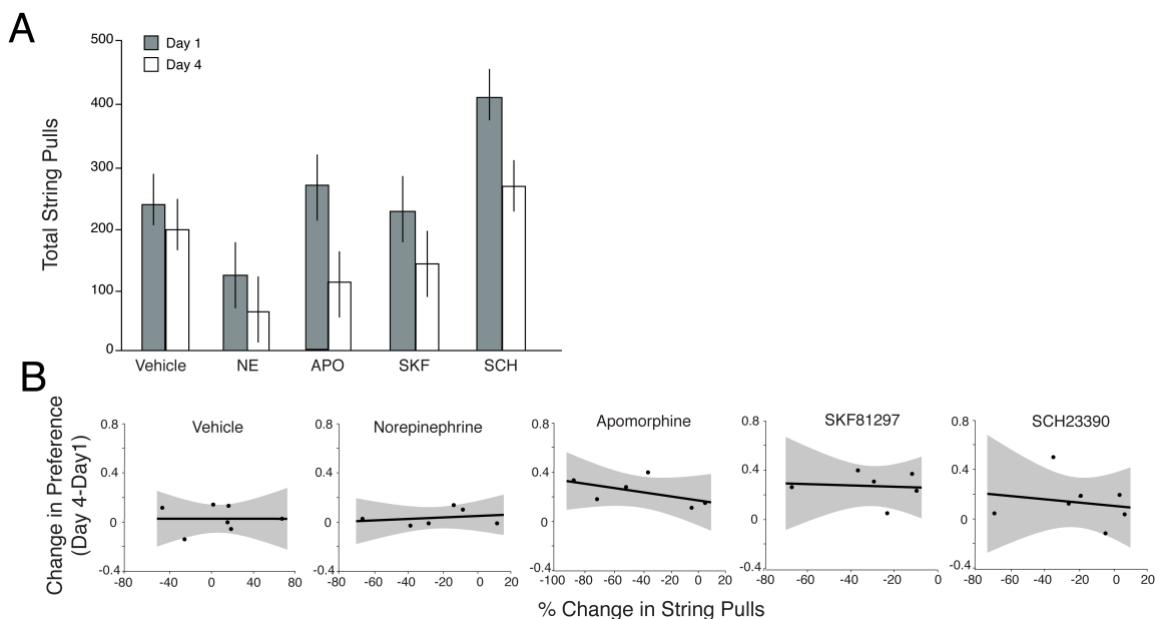

237

238 Suppl. Figure 1. Preference changes not correlated with general changes in motor behavior or motivation. A)  
239 Across all conditions, the total number of string pulls decreased between Day 1 and Day 4. Vehicle (VEH),  
240 norepinephrine (NE), apomorphine (APO), D1 agonist SKF81297 (SKF), D1 antagonist SCH23390 (SCH).  
241 B) However, the percent change in string pulls was not significantly correlated with the change in preference  
242 for any of the conditions.  
243

244 *DA infusions into NCM lead to lasting changes in song preferences*

245

246 To determine the degree to which manipulation of dopamine in the NCM can lead  
247 to lasting changes in preference, we also tested a subset of birds one week  
248 following pairing of song playback and the D1 agonist (see Methods). We found  
249 that these females continued to showed preferences that were significantly  
250 shifted from baseline (Fig. 5A). In particular, females tested one week after  
251 pairing of the D1 receptor agonist and the less-preferred song had significantly  
252 increased preferences for the previously less-preferred song ( $t_{(5)}=-4.76$ ,  
253  $p=0.0050$ ). Moreover, the magnitude of the shift in preference was not  
254 significantly different from females tested immediately following pairing of the D1  
255 receptor agonist and the less-preferred song ( $F_{(1,10)}=0.05$ ;  $p=0.8371$ ; Fig. 5B).  
256 Thus, pairing of song playback with D1 receptor stimulation can result in lasting  
257 changes in song preference.

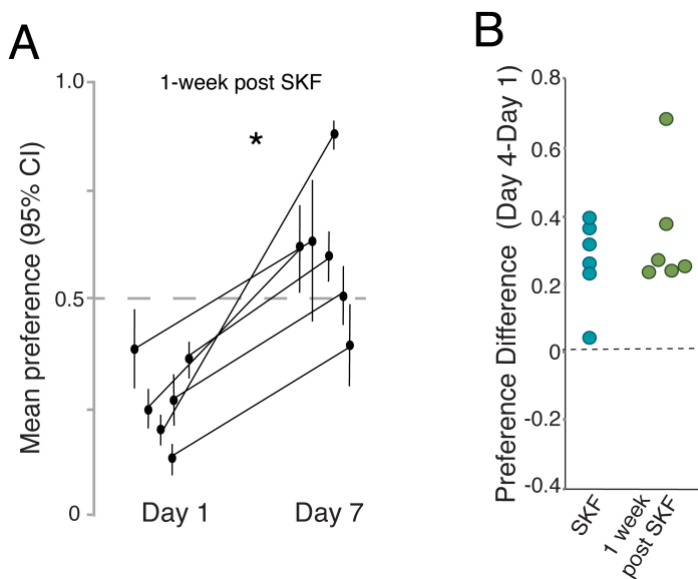

258

259 Figure 5. Lasting preference shifts following DA infusions paired with playback. A) Females tested for  
260 preference one week following pairing of the D1 receptor agonist with playback of the less-preferred song

261 showed significant increases in preference for the less-preferred song. Points are individual birds, bars  
262 indicate bootstrapped confidence intervals (see Methods). No preference is at 0.5 indicated by the dashed  
263 line. B) Preference changes induced by D1 agonist paired with playback of the less-preferred song for  
264 females tested on Day 4 (“SKF”; teal) did not differ significantly from the preference changes of females  
265 tested 1 week later (green). “\*\*” indicates  $p < 0.05$ .  
266

267 *Shifts in preference depend on the timing of drug infusion relative to song*  
268 *playback*

269

270 The effects of VTA stimulation on tonotopic maps in the primary auditory cortex  
271 depend on the timing of stimulation relative to sound playback<sup>19</sup>. This  
272 suggests the possibility that D1-receptor-mediated changes in preference may  
273 require a temporal correspondence between drug infusion and song playback. To  
274 investigate the importance of the temporal association between drug infusion and  
275 song playback for changes in preference, we uncoupled the timing of drug  
276 delivery and song exposure and estimated changes to song preferences (see  
277 Methods). Specifically, during the song exposure on either Day 2 and 3, females  
278 were infused with the D1 agonist for 2-hrs beginning 15-30 minutes after the  
279 termination of playback of the less-preferred song. This uncoupling of drug  
280 infusion and song playback did not lead to a significant shift in song preferences  
281 ( $t_{(5)}=1.11$ ,  $p=0.3181$ ; Fig. 6A). Moreover, the change in preference when the D1-  
282 receptor agonist was uncoupled from song was significantly less than when the  
283 D1-receptor agonist was coupled with song playback ( $p=0.0033$ ; Fig. 6B), and  
284 not significantly different than the lack of preference change following VEH  
285 ( $p=0.8283$ ). Together, these data indicate that the reorganization of song  
286 preference requires the temporal coupling of D1-receptor activation and song  
287 playback.

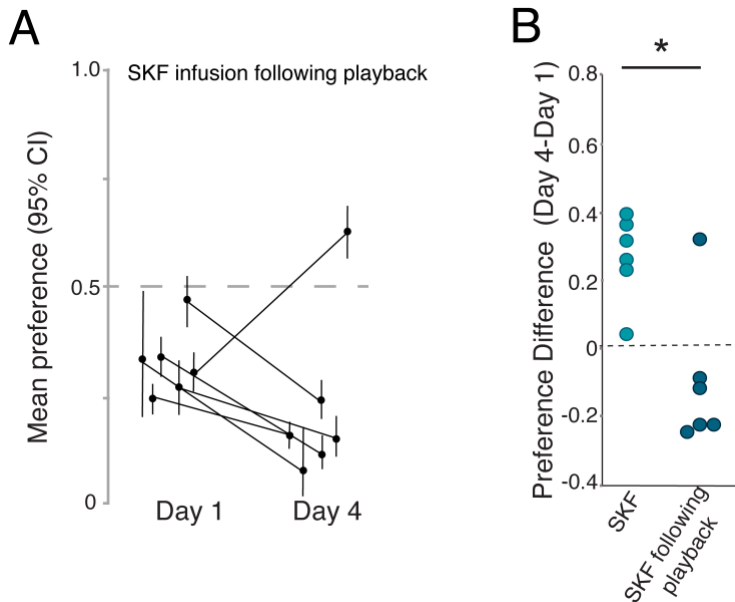

288

289 Figure 6. Preference shifts are dependent upon the timing of drug infusion. A) Infusing the D1 receptor  
290 agonist into NCM after song playback did not lead to greater preference for the less-preferred song. Points  
291 are individual birds, bars indicate bootstrapped confidence intervals (see Methods). B) Comparison of  
292 preference changes induced by D1 agonist paired with playback of the less-preferred song for females  
293 tested on Day 4 (“SKF”; teal) and of females that received SFK infusions 15-30 minutes following song  
294 playback (blue). “\*” indicates  $p < 0.05$ .  
295

## 296 DISCUSSION

297

298 In vocal communication systems, receiver preferences for vocal signals can  
299 depend not only on the features of the signal but also on the receiver’s individual  
300 experience or internal state. The dual tasks of processing a signal’s acoustic  
301 features and its incentive value have been postulated to rely on physiological  
302 processes within sensory and reinforcement pathways respectively. In particular,  
303 auditory cortical circuits are thought to be responsible for detecting and  
304 discriminating acoustic signals while the nucleus accumbens and VTA ascribe  
305 salience and modulate preference for those signals. In line with this, we found  
306 that in female zebra finches preferred songs elicit greater activity in dopamine

307 neurons of the caudal VTA than less-preferred songs. However, we also found  
308 that coupling song playback with pharmacological manipulations of dopamine  
309 receptors within the auditory cortex itself could alter and, in some cases, fully  
310 reverse song preferences. The changes to preference were lasting, as females  
311 still displayed the reversed preference one week later. Moreover, the changes to  
312 preference were not just a consequence of dopamine-dependent changes in the  
313 auditory cortex, since females that heard playback before drug manipulation did  
314 not show altered preferences. Taken together, these data indicate that  
315 dopaminergic projections to the auditory forebrain may directly modulate  
316 behaviorally-relevant auditory preferences and motivate behavior in response to  
317 vocal signals.

318

319 Pairing DA agonists in the NCM with playback of a less-preferred song resulted  
320 in increased preferences for the less-preferred stimulus. Thus, song preferences  
321 are not only plastic under the right conditions, but they can be altered by changes  
322 in the auditory forebrain. In rats, stimulation of the VTA leads to changes in the  
323 inhibitory tone and plasticity in the tonotopic organization of primary auditory  
324 cortex (A1)<sup>19,30</sup>. Specifically, VTA stimulation enhances circuit inhibition in A1,  
325 thereby increasing the auditory-evoked firing precision of A1 neurons<sup>30</sup>.

326 Moreover, pairing VTA stimulation with playback of a tone leads to expanded  
327 representation of that tone in A1<sup>19</sup>. Such targeted changes to A1 firing precision  
328 and tonotopic organization are associated with increased ability to discriminate  
329 sounds<sup>31–33</sup>. However, while previous studies have shown that VTA stimulation



330 leads to auditory cortical plasticity and improved discrimination, changes just to  
331 the representation of a sound have not been hypothesized to result in changes in  
332 preferences. Indeed, in our study, birds were not simply discriminating between  
333 two stimuli, but were pulling strings to hear one song over another; therefore,  
334 their string pulling behavior provided a read-out of their motivation to hear a  
335 particular stimulus. Thus, our data indicate that increasing dopaminergic activity  
336 in the auditory forebrain could lead not only to an increase in the signal-to-noise  
337 ratio, as seen in rodents, but also to a change in the motivation to hear the song  
338 or the pleasure derived from it.

339

340 At the same time, we found that preference for a preferred song could be  
341 diminished following pairing of playback with infusion of a D1-receptor antagonist.  
342 Thus, our data support the possibility that dopamine is released into the NCM in  
343 response to preferred songs and this release may be important for the sustained  
344 preference for that song. These data dovetail with previous work demonstrating  
345 that, in female sparrows, hearing conspecific song (versus silence) leads to  
346 increases in the expression of phosphorylated tyrosine hydroxylase, a marker of  
347 dopamine synthesis, in the NCM and CMM<sup>34</sup>. Together with the lower expression  
348 of FOS in response to less-preferred songs, this indicates that least preferred  
349 songs may elicit lower levels of dopamine release. Future studies using online  
350 methods to measure local changes in dopamine release<sup>35-37</sup> in the auditory  
351 cortex in response to songs of different perceived quality will provide needed  
352 data to clarify this relationship.

353

354 Dopamine release in the striatum and the cortex leads to plasticity through both  
355 long-term potentiation (LTP) and depression (LTD)<sup>38–42</sup>. For example, in the  
356 songbird basal ganglia nucleus Area X, induction of LTP requires activation of  
357 both NMDA and D1 receptors<sup>38</sup>, while in the rat prefrontal cortex dopamine  
358 lowers the threshold for LTD<sup>42</sup>. The effects of dopamine receptor activation on  
359 synaptic plasticity in primary sensory areas have not been directly addressed,  
360 however, one interesting possibility is that, through similar synaptic mechanisms,  
361 pairing of song and dopamine stimulation may lead to changes in the encoding of  
362 auditory objects that could lead to enhanced memory of the song<sup>43,44</sup>. The NCM  
363 has been implicated in auditory memory for songs, including memories of the  
364 song of the tutor as well as a mate<sup>26,45,46</sup>. Moreover, female songbirds show long-  
365 lasting memory for the songs of specific familiar individuals, including songs of  
366 the tutor and the mate<sup>26,47–49</sup>. In males, NCM neurons become more selective for  
367 the tutor song following tutoring<sup>27</sup>. Whether similar processes occur in females,  
368 and the degree to which they are dopamine-dependent is unknown. Future  
369 investigation of whether dopamine in the NCM not only modulates song  
370 preference but also leads to the formation of auditory memories for especially  
371 salient or preferred songs, such as the mate's song, will provide needed and  
372 novel insight into the function of the NCM in auditory perception.

373

374 Attribution of social salience to acoustic signals is a critical step in auditory  
375 processing for vocal communicators. Our data extend existing knowledge about

376 catecholamine function in the auditory cortex<sup>15,19,30,50,51</sup>. Moreover, our results  
377 implicate the auditory cortex in the shaping of auditory preferences. Thus,  
378 dopamine-dependent changes in the auditory cortex may not only increase  
379 representational distinctiveness, heighten signal-to-noise, and improve  
380 discrimination ability, as has been seen in studies on rodents, but these changes  
381 can lead directly to a change in the incentive salience of the sound.

382

## 383 METHODS

384

### 385 Animals

386 All zebra finch females used in this study (N=36, >90 days post-hatch) were  
387 raised with both parents and all siblings until 60 days of age. Thereafter, they  
388 were housed in same-sex group cages in a colony, and thus were acoustically  
389 exposed to the vocalizations of both males and females. Females were  
390 maintained on a 14-hour light, 10-hour dark schedule with *ad libitum* access to  
391 seed, water, and grit. Lettuce and egg supplements were provided once per  
392 week. Bird care and procedures followed all Canadian Council on Animal Care  
393 guidelines and were approved by the Animal Care Committee of McGill  
394 University.

395

### 396 Drugs

397 All drugs were dissolved in DMSO and diluted in sterile phosphate buffered  
398 saline (PBS) such that the final concentration of DMSO was 5%. We used three

399 drugs that target dopamine receptors: Apomorphine (APO, a general dopamine  
400 agonist; 3.3mM; Tocris Bioscience, Minneapolis, MN), SKF-81297 (1mM; a  
401 selective D1-receptor agonist; Sigma Aldrich, Oakville, ON), SCH-23390 (1mM, a  
402 selective D1-receptor antagonist, Tocris Bioscience, Minneapolis, MN). We also  
403 assessed the effects of norepinephrine (NE; 1 mM; Sigma Aldrich, Oakville, ON)  
404 on song preferences. Drug concentrations were determined based on the  
405 literature and personal communication<sup>52-56</sup>. For all tests, PBS containing 5%  
406 DMSO was used as the control vehicle solution (VEH).

407

#### 408 Surgery

409 To manipulate catecholamine levels in NCM, females were bilaterally implanted  
410 with microdialysis guide cannulae targeted at the NCM (Fig 3A). At least 30  
411 minutes prior to surgical procedures, females were given an analgesic (Metacam,  
412 company) and deprived of food and water. At the start of surgery, females  
413 received an intramuscular injection of ketamine (0.04mg/g) and midazolam  
414 (0.0015mg/g) for anesthetic induction and then fitted into a stereotaxic apparatus  
415 (Leica) with a fixed beak angle of 45 degrees. Once birds were placed into the  
416 stereotaxic apparatus, anesthesia was maintained on 0-2% isoflurane vapor for  
417 the duration of the surgery. Guide cannulae containing dummy probes (CMA/7,  
418 CMA Microdialysis, Stockholm, Sweden) were implanted bilaterally in the NCM  
419 (from the caudal Y-sinus: 50  $\mu$ m rostral, 50  $\mu$ m lateral, 150  $\mu$ m deep) through  
420 small windows in both layers of skull and secured in place using epoxy and

421 dental cement. Following surgery, all females were housed individually and given  
422 at least a week to recover before beginning retrodialysis and behavior testing.

423

424 Reverse microdialysis

425 Females were fitted with microdialysis probes into the guide cannulae and  
426 infused with VEH at least 24 hours before the start of the experiment to allow for  
427 habituation. Solutions were retrodialyzed into the NCM using untethered  
428 microdialysis probes (CMA Microdialysis, Kista, Sweden; pore size 6,000  
429 Daltons). Specifically, probe input and output tubing were trimmed to 3-4 cm and  
430 fitted with connectors and custom-made stoppers. Outside of the experimental  
431 period, females were infused every 12 hours with VEH using a syringe pump  
432 (Harvard Apparatus, Holliston, MA; 10  $\mu$ l/min for 4 minutes). On infusion days  
433 (Days 2 and 3), tubing was filled using the syringe pump with 40  $\mu$ l of drug or  
434 VEH via the input tubing. Following song playback exposure, tubing was flushed  
435 with VEH (10  $\mu$ l/min for 4 minutes) then filled with 40  $\mu$ l of VEH (10  $\mu$ l/min for 4  
436 minutes).

437

438 Preference testing

439 For the duration of testing, females were individually housed in sound-attenuating  
440 chambers (TRA Acoustics, Cornwall, Ontario) inside cages equipped to test song  
441 preferences with a string-pull assay. Specifically, cages contained two Cherry 1g  
442 levers, each with a piece of a burlap string attached. Levers were connected to a  
443 computer via a connector block (National Instruments). Sound Analysis Pro

444 software was used to record string pulls and playback songs<sup>22,57</sup>. During song  
445 preference testing, levers were activated so that each string, when pulled,  
446 triggered the playback of one male's song. For example, String 1 triggered the  
447 playback of Male A's song, and String 2 triggered the playback of Male B's song  
448 (Fig 3B). Preference tests consisted of two 2-hour sessions. Females were  
449 required to pull each string a minimum of three times to initiate each session. For  
450 the second session, the song triggered by each string was switched (i.e.,  
451 contingencies reversed; for example, now String 1 triggered Male B's song, and  
452 String 2 triggered Male A's song) to control for place/string preference. Following  
453 the switch in contingencies, the second session began once the female had  
454 pulled each string a minimum of three times. At the end of the second session, all  
455 strings were removed from the cage.

456

#### 457 Experimental Design

458 The experiment followed a four-day schedule. On Day 1, a female's preference  
459 between two male songs was tested using the string pull assay, allowing us to  
460 identify the "preferred song" and "less-preferred song." On Days 2 and 3, females  
461 received retrodialysis of drug or VEH (one treatment per day) during two hours of  
462 passive exposure to the songs of one of the males. The order of song exposure  
463 (preferred vs. less-preferred songs) on days 2 and 3 was randomized within each  
464 female across multiple experiments as well as between females. For tests using  
465 DA and NE agonists, we paired playback of the less-preferred song with infusion  
466 of either a DA receptor agonist (APO, SKF-81297) or NE, and paired playback of

467 the preferred song with infusion of VEH. All infusions occurred 10 to 30 minutes  
468 prior to the beginning of playbacks, and all drugs were washed out (10  $\mu$ l/min for  
469 4 minutes) within 30 minutes following the end of playbacks. On Day 4, the  
470 female's preference was retested (Fig 3C). For tests assessing whether DA  
471 antagonism could decrease preference for the preferred song, we paired  
472 playback of the preferred song with infusion of SCH-23390 and playback of the  
473 less-preferred song with VEH. In the control test, VEH was infused prior to  
474 playback of both the preferred and less-preferred songs. Females each  
475 underwent multiple experiments, with different pairs of male songs for each drug  
476 manipulation. The pair of males paired with each drug manipulation and the order  
477 of drug manipulation was randomized across females.

478

479 We also tested whether DA manipulation was necessary during the song  
480 playback in order to affect preferences. In a separate set of experiments, the DA  
481 agonist SKF81297 was infused 15-30 minutes after playback of the less-  
482 preferred song.

483

484 Anatomy

485 Following the completion of experiments, birds were deeply anesthetized with  
486 isoflurane before being transcardially perfused with 0.9% saline, followed by 4%  
487 paraformaldehyde in 0.025 M phosphate buffer (PB). Brains were post-fixed for  
488 4-hrs, then cryoprotected in 30% sucrose. Forty-micron parasagittal sections  
489 were cut on a freezing microtome and every third section was stained with cresyl

490 violet acetate to determine the locations of cannulae and probes. All females in  
491 this study were confirmed to have probes located within NCM.

492

493 Song stimuli

494 All male song stimuli were female-directed courtship song samples recorded from  
495 males (N=10) from our colony at McGill University. Songs were recorded in  
496 sound-attenuating chambers (TRA Acoustics, Cornwall, Ontario) by briefly  
497 exposing males to stimulus females (not used in this experiment), as has been  
498 previously described<sup>22,26,58</sup>. We created stimuli for five pairs of males for use in  
499 two-choice female preference tests. Pairs consisted of the same two males for all  
500 females (e.g. Male A and Male B were always pair 1, Male C and Male D were  
501 always pair 2, etc.), and females were tested on 2-5 pairs. Males used to  
502 generate song stimuli and females used in this study were unrelated and had  
503 never physically interacted. Song stimuli used for the preference test were  
504 matched for duration and number of introductory notes and were free of noise  
505 and female calls. For each male, we used one song example containing multiple  
506 motifs and introductory notes. All stimulus songs were bandpass filtered (300–10  
507 kHz), normalized by their maximum amplitude, and saved as wav files (44.1 kHz)  
508 using custom written code in Matlab (Mathworks, Natick, MA). We used a  
509 selection of 4-7 recordings of song to provide a representative sample of varying  
510 song duration, number of bouts, and number of introductory notes from each  
511 male's repertoire.

512



513 Analyses

514 All statistical analyses were completed using JMP Statistical Processing Software

515 (SAS, Cary, NC, USA) or custom-written Matlab code (Mathworks, Natick, MA).

516 To quantify female preference for one song over the other, we determined the

517 distribution of string pulls for Male A versus Male B. The initially preferred male

518 was attributed a value of 1, and the less-preferred male a value of zero, and the

519 distribution of pulls was bootstrapped with replacement (10,000 iterations) to

520 obtain 95% confidence intervals. We also calculated the “strength of preference”

521 (the distance of the bootstrapped distribution mean from 0.5, a chance

522 distribution). This allowed us to separate the strength of preference from the

523 directionality, for example if females had strong preferences overall but differed in

524 which male they preferred.

525

526 To assess whether females demonstrated song preferences during the

527 preference tests, we conducted two-tailed single-sample t-tests on mean

528 “strength of preference” for each pair of males and tested whether the distribution

529 of preference significantly differed from chance ( $H_0=0.5$ ). We also tested whether

530 mean preference between the two males was skewed in any of our pairs by

531 attributing one male a value of one and the other male a value of zero across all

532 females. We then conducted two-tailed single-sample t-tests by pair to see

533 whether the mean preference between two males was significantly different from

534 0.5 (chance).

535

536 To examine whether the drug manipulation paired with playback of the less-  
537 preferred male's song was related to change in preference between Day 1 and  
538 Day 4, we performed paired t-tests of the bootstrapped means for Day 1 and Day  
539 4 for each drug. We also tested whether the amount by which behavior shifted  
540 was related to drug manipulation using a model with percent change in string pull  
541 distribution as a dependent variable, drug as an independent variable, and  
542 female ID as a random variable. All models were conducted using a restricted  
543 maximum likelihood approach with unbounded variance components.

544

545 Finally, we examined whether overall changes in activity could account for the  
546 changes in preference. To do this, we used a model with percent change in string  
547 pull distribution as the dependent variable, percent change in overall string  
548 pulling as an independent variable, and bird ID as a random variable,  
549 independently for each drug.

550

## 551 ACKNOWLEDGEMENTS

552 We would like to thank Jon T. Sakata for helpful discussions and comments on  
553 the manuscript. In addition, we would like to thank Therese Koch for help with  
554 preference testing and histology. This work was funded by the Natural Sciences  
555 and Engineering Research Council of Canada (NSERC) and Fonds de  
556 Recherche du Québec – Nature et technologies (FQRNT) to SCW, a McGill  
557 Integrated Program in Neuroscience returning student award to HJB, and a Lloyd  
558 Carr-Harris fellowship to EMW.

559

## 560 AUTHOR CONTRIBUTIONS

561 HJB and SCW designed the experiments; HJB and EMW performed the  
562 experiments; HJB and SCW analyzed the data; HJB, EMW, and SCW wrote and  
563 edited the manuscript.

564

## 565 COMPETING INTERESTS

566 The authors declare no competing interests.

567

## 568 REFERENCES

- 569 1. Bakin, J. S., South, D. A. & Weinberger, N. M. Induction of receptive field  
570 plasticity in the auditory cortex of the guinea pig during instrumental  
571 avoidance conditioning. *Behavioral Neuroscience* **110**, 905–913 (1996).
- 572 2. Edeline, J.-M., Pham, P. & Weinberger, N. M. Rapid development of learning-  
573 induced receptive field plasticity in the auditory cortex. *Behavioral*  
574 *Neuroscience* **107**, 539–551 (1993).
- 575 3. Froemke, R. C. & Jones, B. J. Development of auditory cortical synaptic  
576 receptive fields. *Neuroscience & Biobehavioral Reviews* **35**, 2105–2113  
577 (2011).
- 578 4. Pienkowski, M. & Eggermont, J. J. Cortical tonotopic map plasticity and  
579 behavior. *Neuroscience & Biobehavioral Reviews* **35**, 2117–2128 (2011).
- 580 5. Miranda, J. A. & Wilczynski, W. Female reproductive state influences the  
581 auditory midbrain response. *J Comp Physiol A* **195**, 341–349 (2009).

- 582 6. Sisneros, J. A. Steroid-dependent auditory plasticity for the enhancement of  
583 acoustic communication: Recent insights from a vocal teleost fish. *Hearing*  
584 *Research* **252**, 9–14 (2009).
- 585 7. Caras, M. L., Sen, K., Rubel, E. W. & Brenowitz, E. A. Seasonal Plasticity of  
586 Precise Spike Timing in the Avian Auditory System. *J. Neurosci.* **35**, 3431–  
587 3445 (2015).
- 588 8. Miranda, J. A. & Liu, R. C. Dissecting natural sensory plasticity: Hormones  
589 and experience in a maternal context. *Hearing Research* **252**, 21–28 (2009).
- 590 9. Marlin, B. J., Mitre, M., D’amour, J. A., Chao, M. V. & Froemke, R. C.  
591 Oxytocin enables maternal behaviour by balancing cortical inhibition. *Nature*  
592 **520**, 499–504 (2015).
- 593 10. Marlin, B. J. & Froemke, R. C. Oxytocin modulation of neural circuits for  
594 social behavior. *Developmental Neurobiology* **77**, 169–189 (2017).
- 595 11. Maney, D. L. The incentive salience of courtship vocalizations: Hormone-  
596 mediated ‘wanting’ in the auditory system. *Hearing Research* **305**, 19–30  
597 (2013).
- 598 12. Berridge, K. C. The debate over dopamine’s role in reward: the case for  
599 incentive salience. *Psychopharmacology* **191**, 391–431 (2007).
- 600 13. Berke, J. D. What does dopamine mean? *Nature Neuroscience* **21**, 787–793  
601 (2018).
- 602 14. Schultz, W., Dayan, P. & Montague, P. R. A Neural Substrate of Prediction  
603 and Reward. *Science* **275**, 1593–1599 (1997).

- 604 15. Bromberg-Martin, E. S., Matsumoto, M. & Hikosaka, O. Dopamine in  
605 Motivational Control: Rewarding, Aversive, and Alerting. *Neuron* **68**, 815–834  
606 (2010).
- 607 16. Fields, H. L., Hjelmstad, G. O., Margolis, E. B. & Nicola, S. M. Ventral  
608 Tegmental Area Neurons in Learned Appetitive Behavior and Positive  
609 Reinforcement. *Annual Review of Neuroscience* **30**, 289–316 (2007).
- 610 17. Aragona, B. J., Liu, Y., Curtis, J. T., Stephan, F. K. & Wang, Z. A Critical Role  
611 for Nucleus Accumbens Dopamine in Partner-Preference Formation in Male  
612 Prairie Voles. *J. Neurosci.* **23**, 3483–3490 (2003).
- 613 18. Gobrogge, K. & Wang, Z. The ties that bond: neurochemistry of attachment in  
614 voles. *Current Opinion in Neurobiology* **38**, 80–88 (2016).
- 615 19. Bao, S., Chan, V. T. & Merzenich, M. M. Cortical remodelling induced by  
616 activity of ventral tegmental dopamine neurons. *Nature* **412**, 79 (2001).
- 617 20. Puschmann, S., Brechmann, A. & Thiel, C. M. Learning-dependent plasticity  
618 in human auditory cortex during appetitive operant conditioning. *Human Brain*  
619 *Mapping* **34**, 2841–2851 (2013).
- 620 21. Salimpoor, V. N., Zald, D. H., Zatorre, R. J., Dagher, A. & McIntosh, A. R.  
621 Predictions and the brain: how musical sounds become rewarding. *Trends in*  
622 *Cognitive Sciences* **19**, 86–91 (2015).
- 623 22. Schubloom, H. E. & Woolley, S. C. Variation in social relationships relates to  
624 song preferences and EGR1 expression in a female songbird. *Developmental*  
625 *Neurobiology* **76**, 1029–1040 (2016).

- 626 23. Riebel, K., Smallegange, I. M., Terpstra, N. J. & Bolhuis, J. J. Sexual equality  
627 in zebra finch song preference: evidence for a dissociation between song  
628 recognition and production learning. *Proceedings of the Royal Society of*  
629 *London. Series B: Biological Sciences* **269**, 729–733 (2002).
- 630 24. Barr, H. J. & Woolley, S. C. Developmental auditory exposure shapes  
631 responses of catecholaminergic neurons to socially-modulated song.  
632 *Scientific Reports* **8**, (2018).
- 633 25. Bolhuis, J. J. & Gahr, M. Neural mechanisms of birdsong memory. *Nature*  
634 *Reviews Neuroscience* **7**, 347–357 (2006).
- 635 26. Woolley, S. C. & Doupe, A. J. Social Context–Induced Song Variation Affects  
636 Female Behavior and Gene Expression. *PLOS Biology* **6**, e62 (2008).
- 637 27. Yanagihara, S. & Yazaki-Sugiyama, Y. Auditory experience-dependent  
638 cortical circuit shaping for memory formation in bird song learning. *Nature*  
639 *Communications* **7**, 11946 (2016).
- 640 28. Chew, S. J., Vicario, D. S. & Nottebohm, F. A large-capacity memory system  
641 that recognizes the calls and songs of individual birds. *Proceedings of the*  
642 *National Academy of Sciences* **93**, 1950–1955 (1996).
- 643 29. Kubikova, L., Wada, K. & Jarvis, E. D. Dopamine receptors in a songbird  
644 brain. *The Journal of Comparative Neurology* **518**, 741–769 (2010).
- 645 30. Lou, Y. *et al.* Ventral tegmental area activation promotes firing precision and  
646 strength through circuit inhibition in the primary auditory cortex. *Front. Neural*  
647 *Circuits* **8**, (2014).

- 648 31. Shepard, K. N., Kilgard, M. P. & Liu, R. C. Experience-Dependent Plasticity  
649 and Auditory Cortex. in *Neural Correlates of Auditory Cognition* (eds. Cohen,  
650 Y. E., Popper, A. N. & Fay, R. R.) 293–327 (Springer New York, 2013).  
651 doi:10.1007/978-1-4614-2350-8\_10
- 652 32. Reed, A. *et al.* Cortical Map Plasticity Improves Learning but Is Not  
653 Necessary for Improved Performance. *Neuron* **70**, 121–131 (2011).
- 654 33. Carcea, I. & Froemke, R. C. Chapter 3 - Cortical Plasticity, Excitatory–  
655 Inhibitory Balance, and Sensory Perception. in *Progress in Brain Research*  
656 (eds. Merzenich, M. M., Nahum, M. & Van Vleet, T. M.) **207**, 65–90 (Elsevier,  
657 2013).
- 658 34. Matragrano, L. L. *et al.* Rapid Effects of Hearing Song on Catecholaminergic  
659 Activity in the Songbird Auditory Pathway. *PLoS ONE* **7**, e39388 (2012).
- 660 35. Tanaka, M., Sun, F., Li, Y. & Mooney, R. A mesocortical dopamine circuit  
661 enables the cultural transmission of vocal behaviour. *Nature* **563**, 117–120  
662 (2018).
- 663 36. Hamid, A. A. *et al.* Mesolimbic dopamine signals the value of work. *Nature*  
664 *Neuroscience* **19**, 117–126 (2016).
- 665 37. Howe, M. W. & Dombeck, D. A. Rapid signalling in distinct dopaminergic  
666 axons during locomotion and reward. *Nature* **535**, 505–510 (2016).
- 667 38. Ding, L. & Perkel, D. J. Long-Term Potentiation in an Avian Basal Ganglia  
668 Nucleus Essential for Vocal Learning. *J. Neurosci.* **24**, 488–494 (2004).
- 669 39. Ding, L. & Perkel, D. J. Dopamine Modulates Excitability of Spiny Neurons in  
670 the Avian Basal Ganglia. *J. Neurosci.* **22**, 5210–5218 (2002).

- 671 40. Calabresi, P., Picconi, B., Tozzi, A. & Di Filippo, M. Dopamine-mediated  
672 regulation of corticostriatal synaptic plasticity. *Trends in Neurosciences* **30**,  
673 211–219 (2007).
- 674 41. Otani, S., Daniel, H., Roisin, M.-P. & Crepel, F. Dopaminergic Modulation of  
675 Long-term Synaptic Plasticity in Rat Prefrontal Neurons. *Cereb Cortex* **13**,  
676 1251–1256 (2003).
- 677 42. Sheynikhovich, D., Otani, S. & Arleo, A. Dopaminergic Control of Long-Term  
678 Depression/Long-Term Potentiation Threshold in Prefrontal Cortex. *J.*  
679 *Neurosci.* **33**, 13914–13926 (2013).
- 680 43. Wise, R. A. Dopamine, learning and motivation. *Nature Reviews*  
681 *Neuroscience* **5**, 483–494 (2004).
- 682 44. Lisman, J., Grace, A. A. & Duzel, E. A neoHebbian framework for episodic  
683 memory; role of dopamine-dependent late LTP. *Trends in Neurosciences* **34**,  
684 536–547 (2011).
- 685 45. London, S. E. & Clayton, D. F. Functional identification of sensory  
686 mechanisms required for developmental song learning. *Nature Neuroscience*  
687 **11**, 579–586 (2008).
- 688 46. Gobes, S. M. H. & Bolhuis, J. J. Birdsong Memory: A Neural Dissociation  
689 between Song Recognition and Production. *Current Biology* **17**, 789–793  
690 (2007).
- 691 47. Miller, D. B. The acoustic basis of mate recognition by female zebra finches.  
692 *anim behav* **27**, 376–380 (1979).



- 693 48. Miller, D. B. Long-term recognition of father's song by female zebra finches.  
694 *Nature* **280**, 389–391 (1979).
- 695 49. Clayton, N. S. Song discrimination learning in zebra finches. *Animal*  
696 *Behaviour* **36**, 1016–1024 (1988).
- 697 50. Happel, M. F. K. Dopaminergic impact on local and global cortical circuit  
698 processing during learning. *Behavioural Brain Research* **299**, 32–41 (2016).
- 699 51. Sara, S. J. & Bouret, S. Orienting and Reorienting: The Locus Coeruleus  
700 Mediates Cognition through Arousal. *Neuron* **76**, 130–141 (2012).
- 701 52. Acerbo, M. J. & Delius, J. D. Behavioral Sensitization to Apomorphine in  
702 Pigeons (*Columba livia*): Blockade by the D<sub>1</sub> Dopamine Antagonist SCH-  
703 23390. *Behavioral Neuroscience* **118**, 1080–1088 (2004).
- 704 53. Rose, J., Schiffer, A.-M., Dittrich, L. & Güntürkün, O. The role of dopamine in  
705 maintenance and distractability of attention in the “prefrontal cortex” of  
706 pigeons. *Neuroscience* **167**, 232–237 (2010).
- 707 54. Herold, C., Diekamp, B. & Güntürkün, O. Stimulation of dopamine D1  
708 receptors in the avian fronto-striatal system adjusts daily cognitive  
709 fluctuations. *Behavioural Brain Research* **194**, 223–229 (2008).
- 710 55. Diekamp, B., Kalt, T., Ruhm, A., Koch, M. & Güntürkün, O. Impairment in a  
711 discrimination reversal task after D1 receptor blockade in the pigeon  
712 ‘prefrontal cortex’. *Behavioral Neuroscience* **114**, 1145–1155 (2000).
- 713 56. Ikeda, M. Z., Jeon, S. D., Cowell, R. A. & Ramage-Healey, L. Norepinephrine  
714 Modulates Coding of Complex Vocalizations in the Songbird Auditory Cortex

- 715 Independent of Local Neuroestrogen Synthesis. *Journal of Neuroscience* **35**,  
716 9356–9368 (2015).
- 717 57. Tchernichovski, O., Nottebohm, F., Ho, C. E., Pesaran, B. & Mitra, P. P. A  
718 procedure for an automated measurement of song similarity. *Animal*  
719 *Behaviour* **59**, 1167–1176 (2000).
- 720 58. Chen, Y., Clark, O. & Woolley, S. C. Courtship song preferences in female  
721 zebra finches are shaped by developmental auditory experience.  
722 *Proceedings of the Royal Society B: Biological Sciences* **284**, 20170054  
723 (2017).  
724
